# Supplementary material
Source: publisher figshare collection journal article supplement (https://tandf.figshare.com/ndownloader/files/17885165)
Supplement: Supplementary file 1 [file 17885165]

## Supplemental Table.

**Table.** Ongoing clinical trials of sodium–glucose cotransporter-2 inhibitors in patients with or without type 2 diabetes and/or heart failure.

| <b>Study name<br/>(NCT identifier)</b> | <b>Indication<br/>Treatment</b> | <b>No. of<br/>patients</b> | <b>Primary outcome</b>                                       | <b>Estimated<br/>completion date</b> |
|----------------------------------------|---------------------------------|----------------------------|--------------------------------------------------------------|--------------------------------------|
| DELIVER<br>(NCT03619213)               | HFpEF<br>DAPA vs PBO            | 4700 <sup>a</sup>          | CV death, hospitalization for HF,<br>or urgent HF visit      | June 2021                            |
| DETERMINE-Reduced<br>(NCT03877237)     | HFREF<br>DAPA                   | 300 <sup>a</sup>           | Change from baseline in 6MWD<br>at week 16                   | January 2020                         |
| DETERMINE-Preserved<br>(NCT03877224)   | HFpEF<br>DAPA                   | 400 <sup>a</sup>           | Change from baseline in 6MWD<br>at week 16                   | February 2020                        |
| EMPRISE<br>(NCT03363464)               | T2D<br>EMPA vs DPP-4i           | 80,000                     | 3-point MACE, hospitalization for<br>HF, all-cause mortality | November 2021                        |
| EMPEROR-Reduced<br>(NCT03057977)       | HFREF<br>EMPA vs PBO            | 2850 <sup>a</sup>          | CV death or hospitalization for<br>HF                        | June 2020                            |
| EMPEROR-Preserved<br>(NCT03057951)     | HFpEF<br>EMPA vs PBO            | 4126 <sup>a</sup>          | CV death or hospitalization for<br>HF                        | June 2020                            |
| EMPERIAL-Reduced<br>(NCT03448419)      | HFREF<br>EMPA vs PBO            | 300 <sup>a</sup>           | Change in exercise capacity                                  | December 2019                        |
| EMPERIAL-Preserved<br>(NCT03448406)    | HFpEF<br>EMPA vs PBO            | 300 <sup>a</sup>           | Change in exercise capacity                                  | December 2019                        |
| SOLOIST-WHF<br>(NCT03521934)           | T2D + WHF<br>SOTA vs PBO        | 4000 <sup>a</sup>          | CV death or hospitalization for<br>HF                        | January 2021                         |

<sup>a</sup>Estimated enrollment.

6MWD: 6-minute walk distance; CV: cardiovascular; DAPA: dapagliflozin; DPP-4i: dipeptidyl peptidase-4 inhibitor; EMPA: empagliflozin; HF: heart failure; HFpEF: HF with preserved

ejection fraction; HFrEF: HF with reduced ejection fraction; MACE: major adverse CV events; NA; not available; NCT: National Clinical Trial; PBO: placebo; SOTA: sotagliflozin; T2D: type 2 diabetes; WHF: worsening HF.
